# Supplementary material
Source: PubMed Central journal article supplement (PMC3324395)
Supplement: NIHMS365510-supplement-01.pdf [file NIHMS365510-supplement-01.pdf]

Type of file: figure

Label: Supplementary Figures 1-8

Filename: Supplementary Figures\_final.pdf

## Supplementary Information

The transcription factor NR4A1 (Nur77) controls bone marrow differentiation and survival of Ly6C<sup>-</sup> monocytes

Richard N. Hanna<sup>1</sup>, Leo M. Carlin<sup>2</sup>, Harper G. Hubbeling<sup>3</sup>, Dominika Nackiewicz<sup>4</sup>, Angela M. Green<sup>1</sup>, Jennifer A. Punt<sup>3</sup>, Frederic Geissmann<sup>2</sup> & Catherine C. Hedrick<sup>1</sup>

<sup>1</sup>Division of Inflammation Biology, La Jolla Institute for Allergy and Immunology, La Jolla, CA

<sup>2</sup>Centre for Molecular and Cellular Biology of Inflammation, King' s College London, London, UK

<sup>3</sup>Department of Biology, Haverford College, Haverford, PA

<sup>4</sup>Department of Genetics of Microorganisms, University of Lodz, Lodz, Poland

Correspondence should be addressed to C.C.H. ([hedrick@liai.org](mailto:hedrick@liai.org))

Catherine C. Hedrick, PhD

Division of Inflammation Biology

La Jolla Institute for Allergy and Immunology

9420 Athena Circle

La Jolla, CA 92037

Ph: 858-752-6500

Fax: 858-752-6985

## Supplementary Figures 1-8

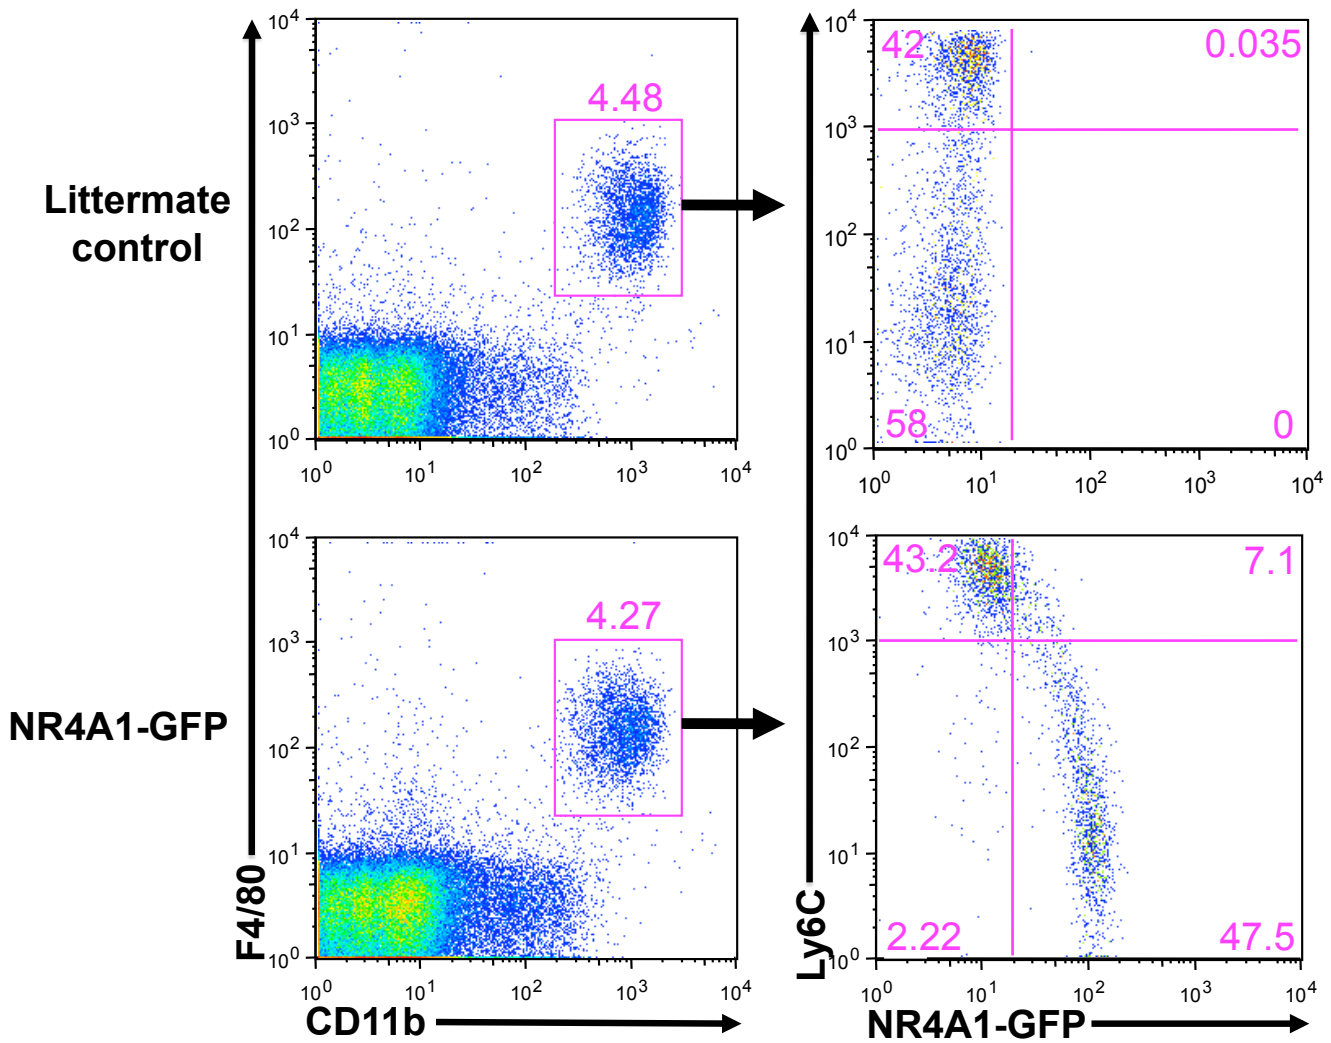

**Supplementary Figure 1. NR4A1-GFP expression in blood monocytes.** Live F4/80<sup>+</sup> CD11b<sup>+</sup> monocytes from the peripheral blood of a NR4A1-GFP transgenic reporter mouse and NR4A1-GFP negative littermate control were assessed for Ly6C and GFP expression. Note: Nearly all F4/80<sup>+</sup> cells in the blood are also CD11b<sup>+</sup>.

WT

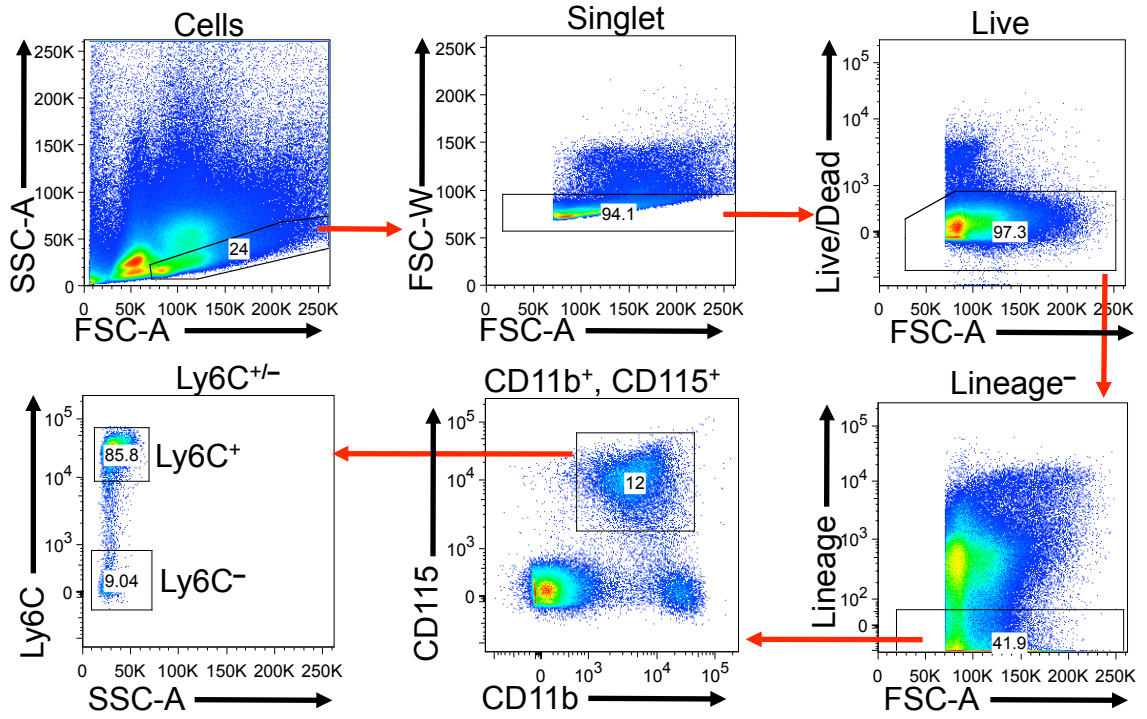

*Nr4a1*<sup>-/-</sup>

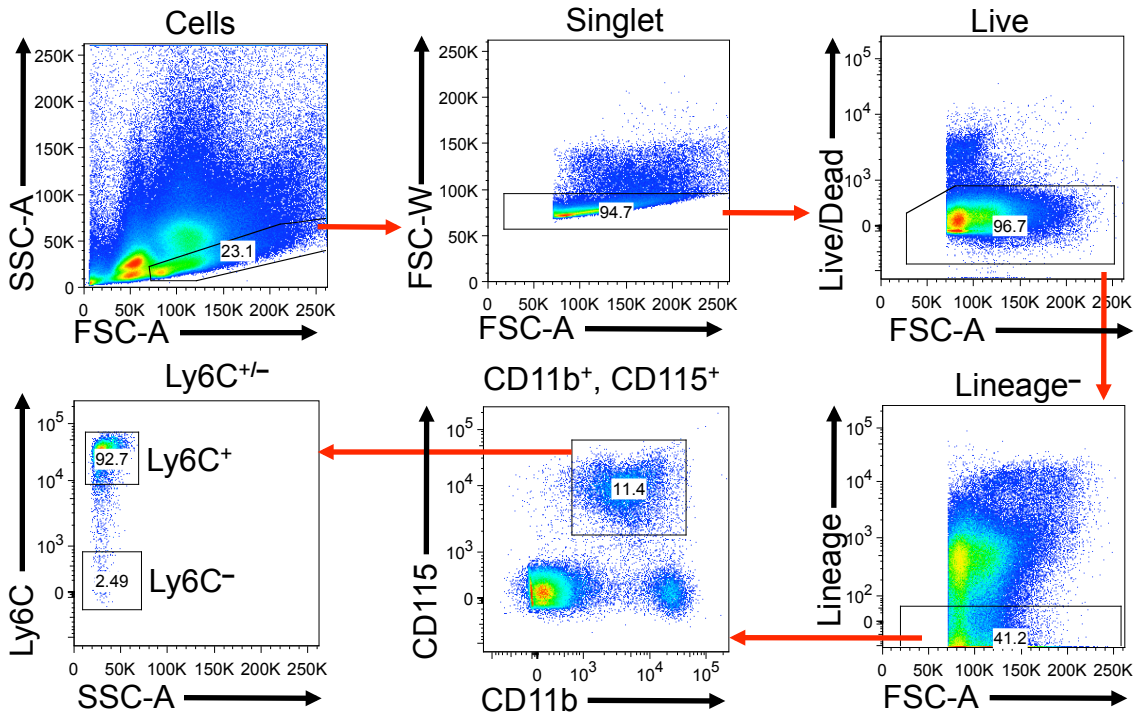

**Supplementary Figure 2. Gating strategy for bone marrow monocyte subsets.** Gating strategy for identification of monocyte populations by flow cytometry of mouse bone marrow. Live, single, Lin<sup>-</sup> (CD3 $\epsilon$ , CD19, CD49b, Ly6G, CD117) cells with low side scatter (SSC) were plotted for CD115 and CD11b expression. CD115<sup>+</sup>, CD11b<sup>+</sup> monocytes were then subdivided based on their + or - expression of Ly6C.

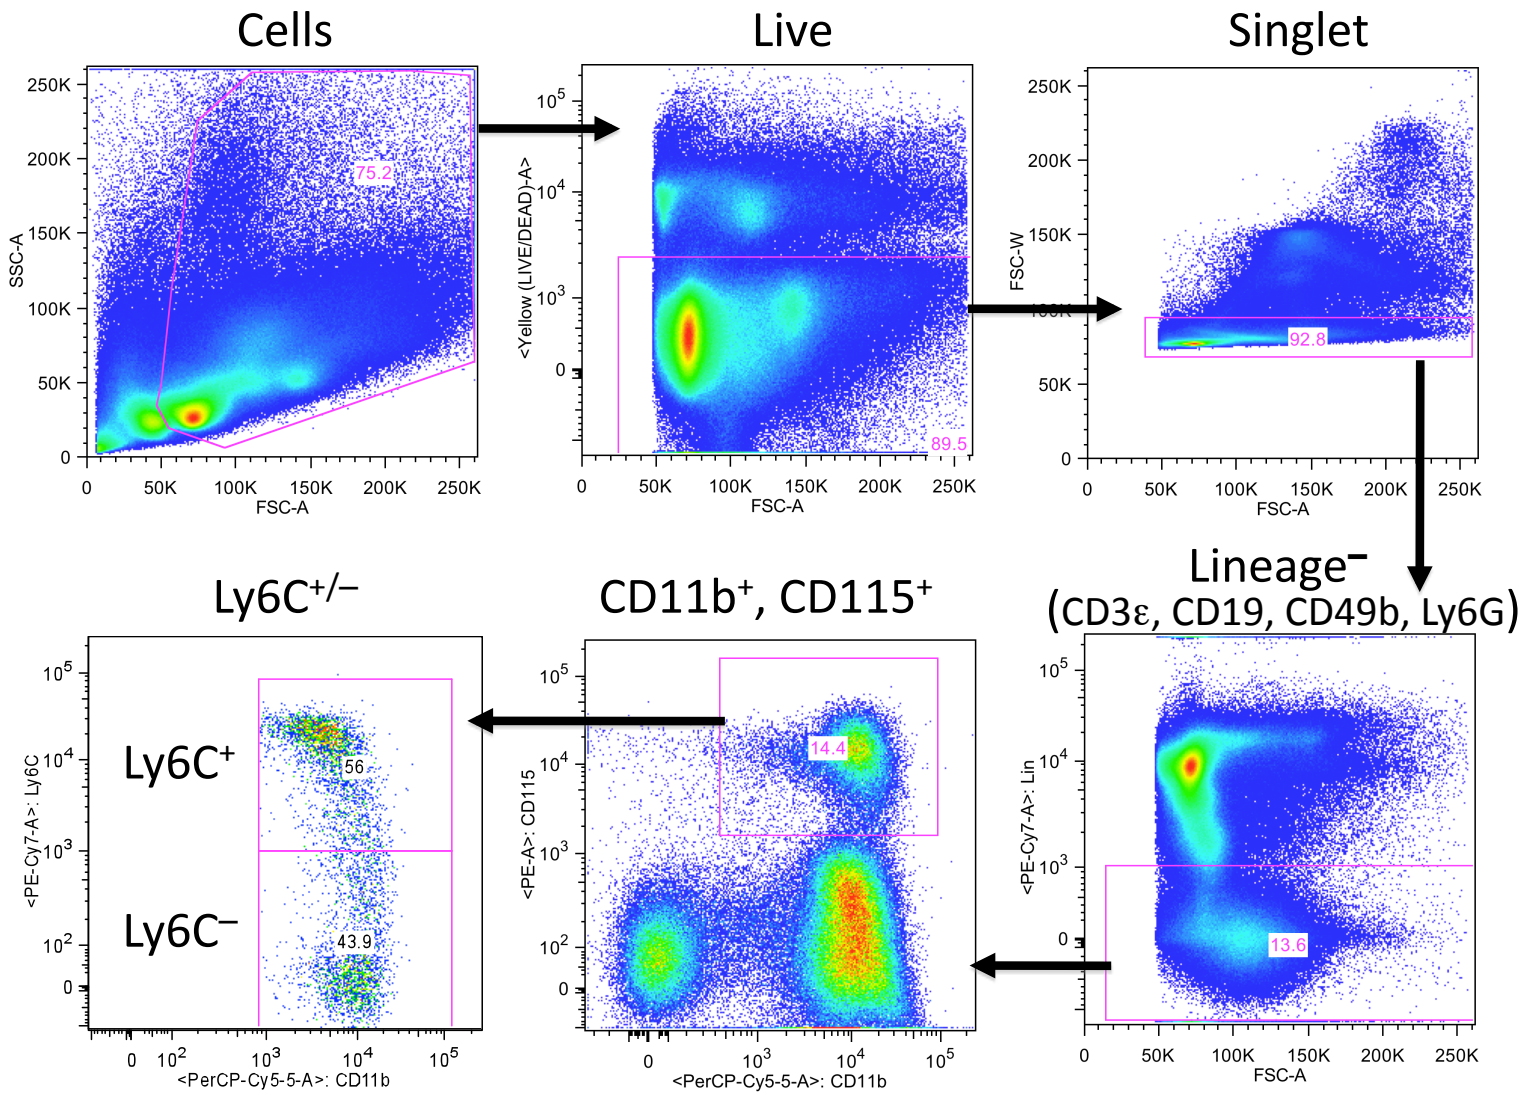

**Supplementary Figure 3. Gating strategy for blood and spleen monocyte subsets.**

Gating strategy for identification of monocyte populations by flow cytometry of mouse spleen and blood. Live, single, Lin<sup>-</sup> (CD3 $\epsilon$ , CD19, CD49b, Ly6G) cells were plotted for CD115 and CD11b expression. CD115<sup>+</sup>, CD11b<sup>+</sup> monocytes were then subdivided based on their + or - expression of Ly6C.

**a**

WT

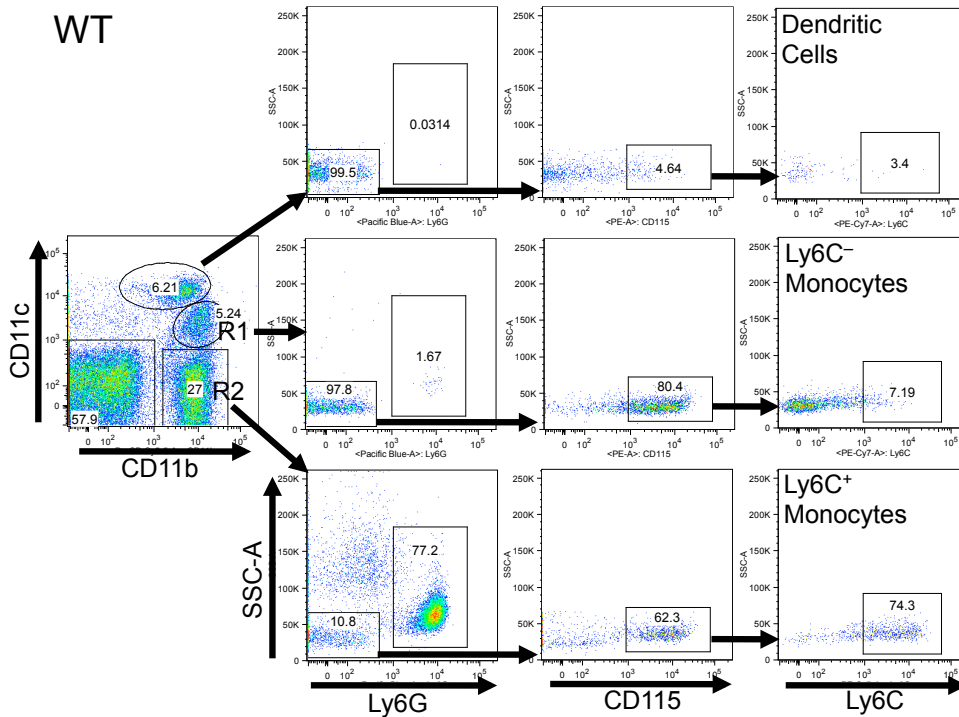*Nr4a1*<sup>-/-</sup>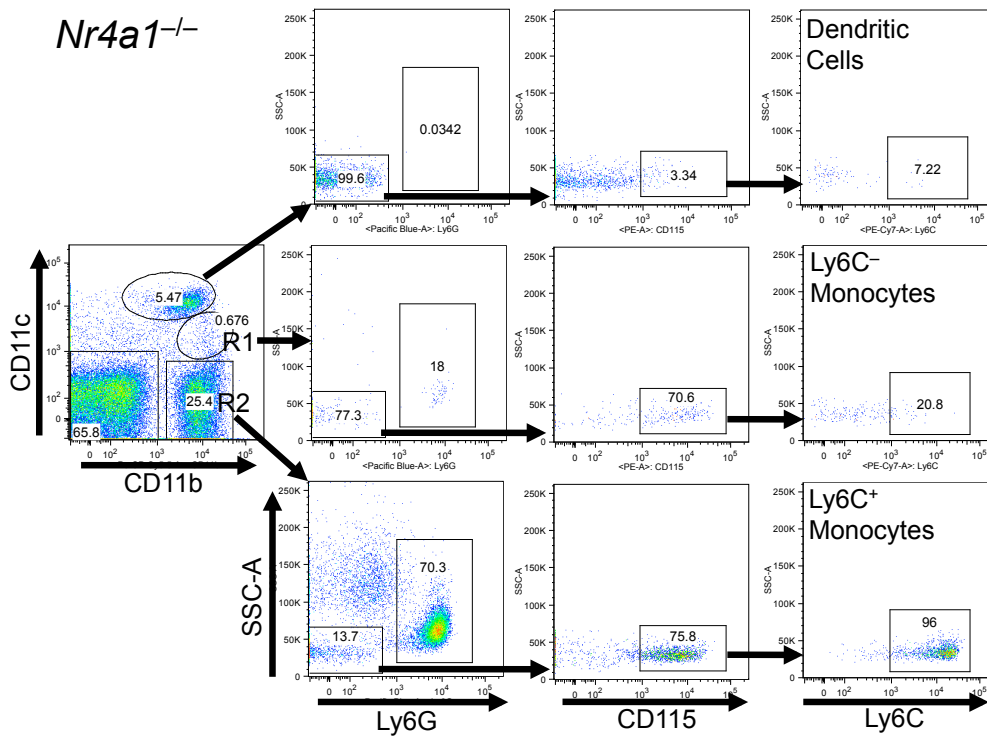**b**

| Marker | Ly6C <sup>-</sup> (R1) | Ly6C <sup>+</sup> (R2) |
|--------|------------------------|------------------------|
| CD11b  | +                      | +                      |
| CD115  | +                      | +                      |
| Ly6C   | -                      | +                      |
| CD62L  | Low (<20%+)            | +                      |
| CD11c  | Mid                    | -                      |
| CCR2   | -                      | +                      |
| CX3CR1 | High                   | Mid                    |
| CD43   | +                      | +                      |
| F480   | Low (<30%+)            | Low (<30%+)            |
| CD103  | Low (<20%+)            | Low (<20%+)            |
| CD11a  | +                      | +                      |
| Ly6G   | -                      | -                      |
| CD135  | -                      | -                      |
| B220   | -                      | -                      |
| PDCA   | -                      | -                      |
| CD8    | -                      | -                      |
| CD3ε   | -                      | -                      |
| DX5    | -                      | -                      |
| CD19   | -                      | -                      |
| CD45   | +                      | +                      |

**Supplementary Figure 4. Analysis of surface markers on Ly6C<sup>+</sup> and Ly6C<sup>-</sup> subsets. (a)** The two monocyte populations (Ly6C<sup>+</sup> and -) in spleen were further examined for expression of a variety of surface markers by flow cytometry in *Nr4a1*<sup>-/-</sup> or wild-type (WT) control mice. **(b)** The two monocyte populations in wild-type mice varied in their expression of Ly6C, CD62L, CD11c, CCR2 and CX3CR1 (red box).

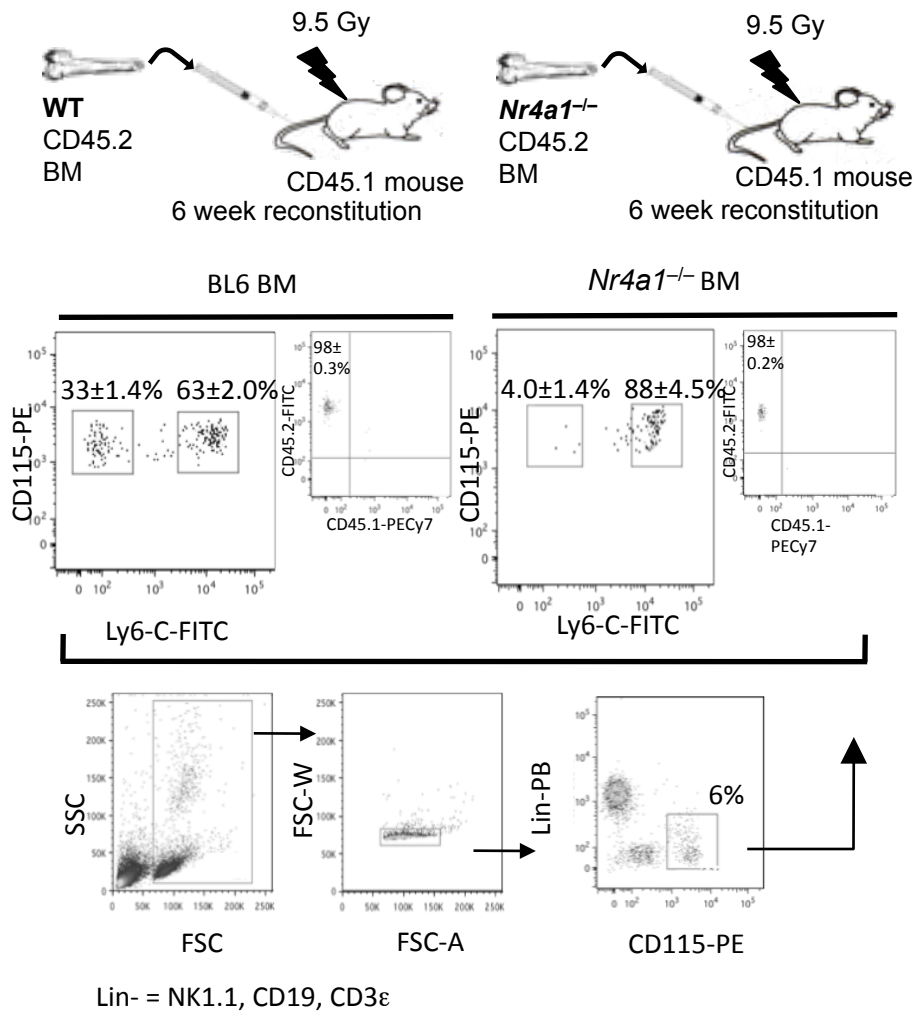

**Supplementary Figure 5. Analysis of reconstitution in chimeric studies.** Blood monocyte subsets from wild-type (WT) or *Nr4a1*<sup>-/-</sup> bone marrow chimera analyzed by flow cytometry. Lineage negative (NK1.1, CD19, CD3ε) CD115<sup>+</sup> cells were analyzed for expression of Ly6C, CD45.2 (donor), and CD45.1 (recipient). Chimerism was 98% for both wild-type and *Nr4a1*<sup>-/-</sup> bone marrow chimera. Ly6C<sup>low</sup> Lin<sup>-</sup> CD115<sup>+</sup> cells represented 33±1.4% of monocytes in wild-type bone marrow chimera, but 4±1.4% in *Nr4a1*<sup>-/-</sup> BM recipients.

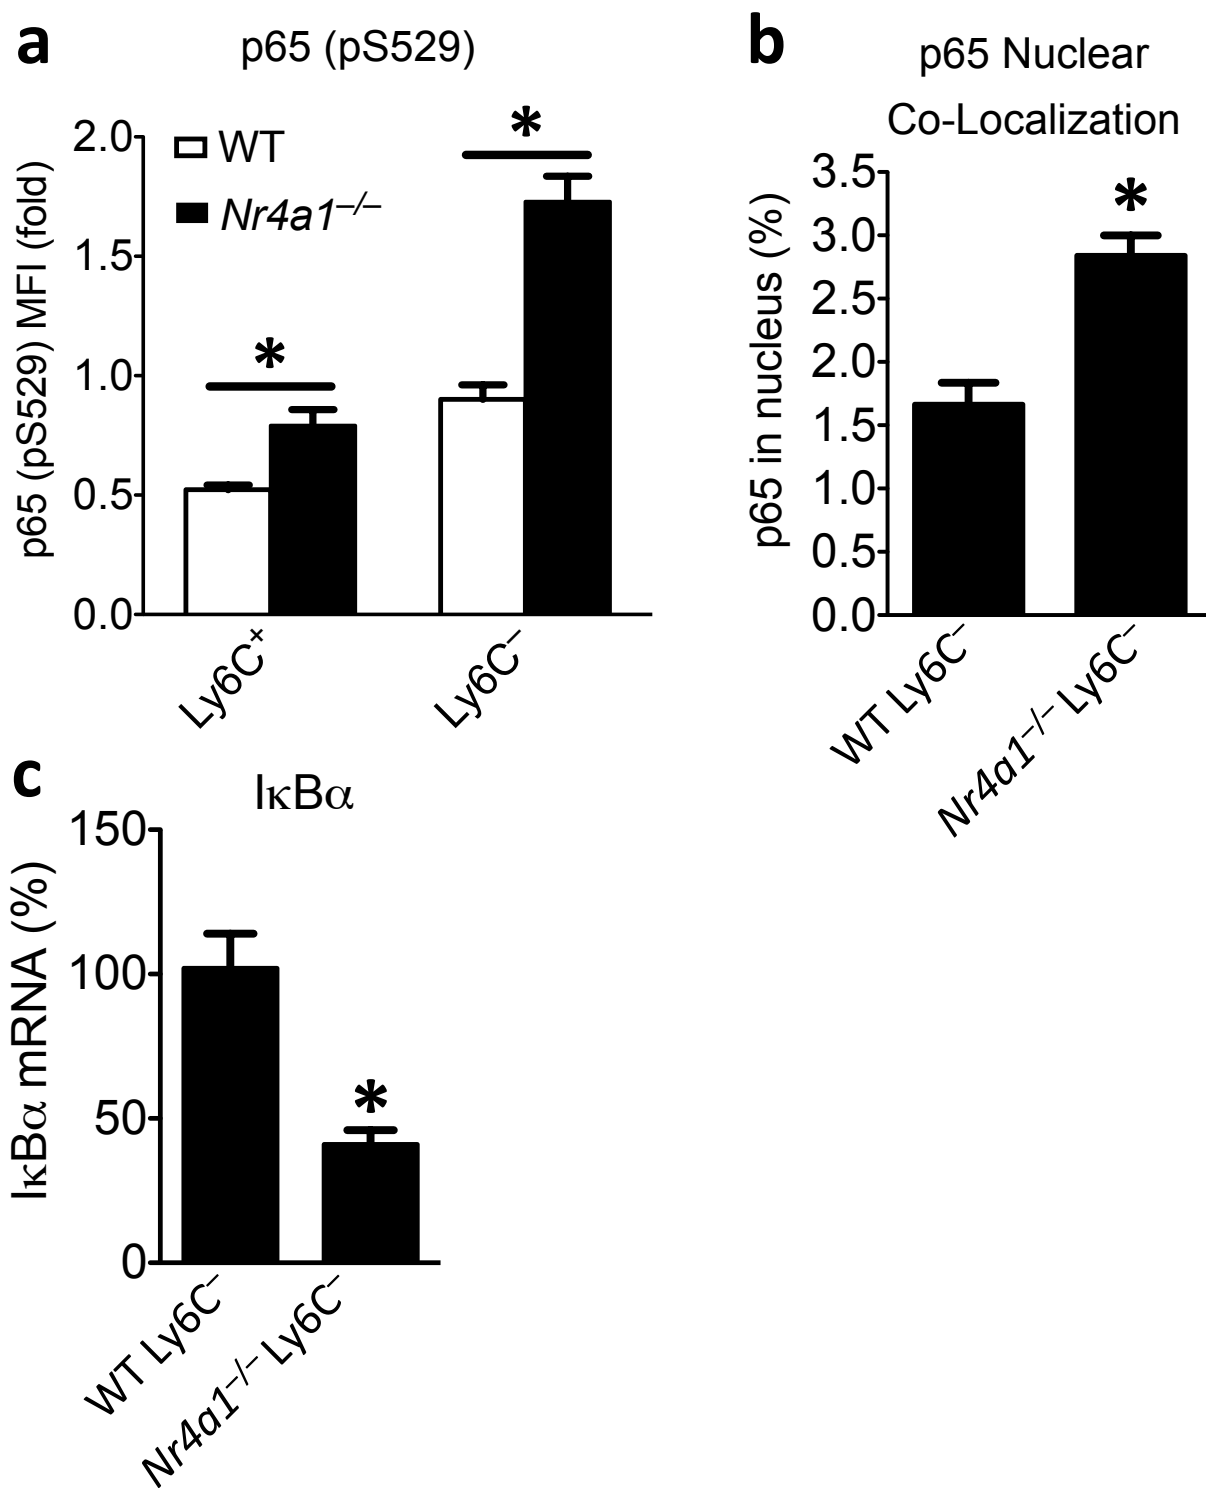

**Supplementary Figure 6. Analysis of NFκB activity in bone marrow monocytes. (a)** Relative activity of p65 (pS529) activity in bone marrow monocytes from *Nr4a1*<sup>-/-</sup> or wild-type (WT) control mice as measured by intracellular flow cytometric analysis using an anti-p65 phosphoserine 529 antibody. (\*p<0.05 n=4) **(b)** Nuclear co-localization of p65 in bone marrow Ly6C<sup>-</sup> monocyte populations from *Nr4a1*<sup>-/-</sup> and wild-type control mice measured by immunofluorescence microscopy. Monocytes were sorted by FACS, fixed on slides and then stained with p65 antibody and DAPI staining of the nucleus. The percent of p65 staining co-localized in the nucleus was quantified using Imaris software. (\*p<0.05 n=6) **(c)** Relative expression of IκBα transcripts in Ly6C<sup>-</sup> monocytes isolated by FACS from bone marrow of *Nr4a1*<sup>-/-</sup> or wild-type mice measured by qRT-PCR. (\*p<0.05 n=6, expressed as a percentage of wild-type transcript).



| <b>Antibody</b>     | <b>Company</b>      | <b>Clone</b>                                                                                              | <b>Secondary (if not directly conjugated)</b>                         |
|---------------------|---------------------|-----------------------------------------------------------------------------------------------------------|-----------------------------------------------------------------------|
| CD49b               | eBioscience         | DX5                                                                                                       |                                                                       |
| CD3e                | BD Pharmingen       | 145-2C11                                                                                                  |                                                                       |
| NK1.1               | eBioscience         | PK136                                                                                                     |                                                                       |
| CD19                | eBioscience         | 1D3                                                                                                       |                                                                       |
| B220                | eBioscience         | RA3-6B2                                                                                                   |                                                                       |
| Ly6G                | Biolegend           | 1A8                                                                                                       |                                                                       |
| CD11c               | eBioscience         | N418                                                                                                      |                                                                       |
| CD115               | Biolegend           | AFS98                                                                                                     |                                                                       |
| CD11b               | BD Pharmingen       | M1/70                                                                                                     |                                                                       |
| LY6C                | BD Biosciences      | AL-21                                                                                                     |                                                                       |
| F4/80               | Biolegend           | BM8                                                                                                       |                                                                       |
| CD62L               | BD Biosciences      | MEL14                                                                                                     |                                                                       |
| CD45.1              | Biolegend           | A20                                                                                                       |                                                                       |
| CD45.2              | Biolegend           | 104                                                                                                       |                                                                       |
| CX3CR1              | Santa Cruz          | T-20                                                                                                      | anti-goat IgG-FITC (SC-2777)<br>SC                                    |
| CCR2                | (Mack et al., 2001) | MC21                                                                                                      | biotin anti-rat IgG (RG7/11.1)<br>BD, streptavidin-APC (554067)<br>BD |
| Lineage<br>Cocktail | BD Pharmingen       | CD3e<br>(145-2C11),<br>CD11b (M1/70),<br>B220<br>(RA3-6B2),<br>Ly-76<br>(TER-119),<br>Ly6C/G<br>(RB6-8C5) |                                                                       |
| CD117               | eBioscience         | 2B8                                                                                                       |                                                                       |
| SCA-1 (Ly6A/E)      | Biolegend           | E13-161.7                                                                                                 |                                                                       |
| CD34                | BD Biosciences      | RAM34                                                                                                     |                                                                       |
| Nur77               | BD Biosciences      | 12.14                                                                                                     | eBiosciences (11-4011-85)                                             |
| CD11a (LFA-1)       | BD Biosciences      | M17/4                                                                                                     |                                                                       |
| H2A.X (pS139)       | Biolegend           | 2F3                                                                                                       |                                                                       |
| Active<br>Caspase-3 | BD Biosciences      | C92-605                                                                                                   |                                                                       |
| p65 (pS529)         | BD Biosciences      | K10-895.12.50                                                                                             |                                                                       |

**Supplementary Figure 7. List of antibodies used for flow cytometry.**

| <b>Taqman Primers</b> |                    |
|-----------------------|--------------------|
| <b>Assay ID</b>       | <b>Gene Symbol</b> |
| 4352932-0912031       | Gapdh              |
| Mm01300401_m1         | Nr4a1 (Nur77)      |
| Mm00443060_m1         | Nr4a2 (Nurr1)      |
| Mm00450074_m1         | Nr4a3 (NOR-1)      |
| Mm00477798_m1         | Nfkbia (IkBa)      |
| Mm00772472_m1         | Cdc2a (Cdk1)       |
| Mm00438064_m1         | Ccna2 (Cyclin A2)  |
| Mm00438070_m1         | Ccnd2 (Cyclin D2)  |
| Mm00624964_m1         | E2F2               |
| Mm00438354_m1         | cx3cr1             |
| Mm00492781_s1         | Junb               |
| Mm00843434_s1         | Cebpb              |
| Mm00488140_m1         | Sfpil (Pu.1)       |

**Supplementary Figure 8. List of TaqMan primers used for qRT-PCR.**
